# Supplementary material for: Exercise Mode in Heart Failure: A Systematic Review and Meta-Analysis
Source: PubMed Central journal article supplement (PMC9829948; doi:10.1186/s40798-022-00549-1), 2023-01-09
Supplement: 40798_2022_549_MOESM1_ESM.pdf [file 40798_2022_549_MOESM1_ESM.pdf]

## **Exercise mode in heart failure: A systematic review and meta-analysis.**

Edwards, J.J,<sup>1</sup> Shanmugam, N<sup>2</sup>., Ray, R<sup>2</sup>., Jouhra, F<sup>2</sup>., Mancio, J<sup>2</sup>., Wiles, J.D<sup>1</sup>., Marciniak, A<sup>2</sup>., Sharma, R<sup>2</sup>., O'Driscoll, J.M.<sup>1,2</sup>

<sup>1</sup>School of Psychology and Life Sciences, Canterbury Christ Church University, Kent, CT1 1QU

<sup>2</sup>Department of Cardiology, St George's Healthcare NHS Trust, Blackshaw Road, Tooting, London, SW17 0QT.

Correspondence to Dr Jamie O'Driscoll, School of Psychology and Life Sciences, Canterbury Christ Church University, North Holmes Road, Canterbury, Kent, CT1 1 QU. Email: [jamie.odriscoll@canterbury.ac.uk](mailto:jamie.odriscoll@canterbury.ac.uk); Telephone: 01227782711.

**Supplementary File**

## Full systematic search

### PubMed

Full search: ("exercise"[MeSH Terms] OR "exercise training"[Text Word] OR "cardiac rehabilitation"[Text Word]) AND ("heart failure"[MeSH Terms] OR "heart failure, diastolic"[MeSH Terms] OR HFpEF[Text Word] OR "preserved ejection fraction"[Text Word] OR "normal ejection fraction"[Text Word])

### Cochrane

- #1 MeSH descriptor: [Exercise] explode all trees
- #2 MeSH descriptor: [Cardiac Rehabilitation] explode all trees
- #3 #1 OR #2
- #4 MeSH descriptor: [Heart Failure] explode all trees
- #5 MeSH descriptor: [Heart Failure, Diastolic] explode all trees
- #6 HFpEF
- #7 "preserved ejection fraction"
- #8 "normal ejection fraction"

### Web of Science

**Set 1:** TS=("exercise training") OR TS=("Cardiac rehabilitation")

**Set 2:** TS=("heart failure") OR TS=("Diastolic heart failure") OR TS=(HFpEF) OR TS=("preserved ejection fraction") OR TS=("normal ejection fraction")

**Set 3:** WC=Cardiac & Cardiovascular Systems

**Search Performed:** #1 AND #2 AND #3 (articles only filter applied)

**Table S1. Detailed MIT vs CT TESTEX Scoring.**

| <b>Study name</b>            | <b>Eligibility criteria specified</b> | <b>Randomisation specified</b> | <b>Allocation concealment</b> | <b>Groups similar at baseline</b> | <b>Assessors blinded</b> | <b>Outcome measures assessed &gt;85% of participants</b> | <b>Intention to treat analysis</b> | <b>Between group statistical comparisons reported</b> | <b>Point estimates reported</b> | <b>Activity monitoring in control group</b> | <b>Relative exercise intensity review</b> | <b>Exercise volume &amp; energy expended</b> | <b>Overall TESTEX</b> |
|------------------------------|---------------------------------------|--------------------------------|-------------------------------|-----------------------------------|--------------------------|----------------------------------------------------------|------------------------------------|-------------------------------------------------------|---------------------------------|---------------------------------------------|-------------------------------------------|----------------------------------------------|-----------------------|
| <b>Laoutaris et al. 2013</b> | YES                                   | NO                             | NO                            | YES                               | YES                      | YES (2)                                                  | NO                                 | YES (2)                                               | YES                             | YES                                         | YES                                       | YES                                          | 11                    |
| <b>Beckers et al. 2008</b>   | YES                                   | YES                            | YES                           | YES                               | YES                      | YES (2)                                                  | NO                                 | YES (2)                                               | YES                             | YES                                         | YES                                       | NO                                           | 12                    |
| <b>Mandic et al. 2009</b>    | YES                                   | YES                            | NO                            | YES                               | YES                      | YES (2)                                                  | YES                                | YES (2)                                               | YES                             | YES                                         | NO                                        | YES                                          | 12                    |
| <b>Servantes et al. 2012</b> | YES                                   | YES                            | YES                           | YES                               | NO                       | YES (3)                                                  | NO                                 | YES (2)                                               | YES                             | YES                                         | YES                                       | YES                                          | 13                    |

**Table S2. Detailed MIT vs HIIT TESTEX Scoring.**

| Study name                      | Eligibility criteria specified | Randomisation specified | Allocation concealment | Groups similar at baseline | Assessors blinded | Outcome measures assessed >85% of participants | Intention to treat analysis | Between group statistical comparisons reported | Point estimates reported | Activity monitoring in control group | Relative exercise intensity review | Exercise volume & energy expended | Overall TESTEX |
|---------------------------------|--------------------------------|-------------------------|------------------------|----------------------------|-------------------|------------------------------------------------|-----------------------------|------------------------------------------------|--------------------------|--------------------------------------|------------------------------------|-----------------------------------|----------------|
| Iellamo et al. 2013             | YES                            | NO                      | NO                     | YES                        | NO                | YES (2)                                        | NO                          | YES (2)                                        | YES                      | YES                                  | YES                                | YES                               | 10             |
| Ellingsen et al. 2017           | YES                            | YES                     | NO                     | YES                        | YES               | YES (3)                                        | YES                         | YES (2)                                        | YES                      | YES                                  | YES                                | YES                               | 14             |
| Iellamo et al. 2014             | YES                            | YES                     | NO                     | YES                        | NO                | YES (2)                                        | NO                          | YES (2)                                        | YES                      | YES                                  | YES                                | YES                               | 11             |
| Besnier et al. 2019             | YES                            | YES                     | NO                     | YES                        | YES               | YES (2)                                        | YES                         | YES (2)                                        | YES                      | YES                                  | YES                                | YES                               | 13             |
| Koufaki et al. 2014             | YES                            | YES                     | YES                    | YES                        | NO                | YES (2)                                        | NO                          | YES (2)                                        | YES                      | YES                                  | YES                                | YES                               | 12             |
| Wisløff et al. 2007             | YES                            | YES                     | NO                     | YES                        | NO                | YES(3)                                         | YES                         | YES (2)                                        | YES                      | YES                                  | YES                                | YES                               | 13             |
| Dimopoulos et al. 2006          | YES                            | YES                     | NO                     | YES                        | NO                | YES (1)                                        | NO                          | YES (2)                                        | YES                      | YES                                  | YES                                | YES                               | 10             |
| Freyssin et al. 2012            | YES                            | NO                      | NO                     | YES                        | NO                | YES (3)                                        | NO                          | YES (2)                                        | YES                      | YES                                  | YES                                | YES                               | 11             |
| Fu et al. 2013                  | YES                            | NO                      | NO                     | YES                        | NO                | YES (2)                                        | NO                          | YES (2)                                        | YES                      | YES                                  | YES                                | YES                               | 10             |
| Ulbrich et al. 2016             | YES                            | YES                     | YES                    | YES                        | YES               | YES (3)                                        | NO                          | YES (2)                                        | YES                      | YES                                  | YES                                | YES                               | 14             |
| Donelli da Silveira et al. 2020 | YES                            | YES                     | YES                    | YES                        | YES               | YES (3)                                        | NO                          | YES (2)                                        | YES                      | YES                                  | YES                                | YES                               | 14             |
| Angadi et al. 2015              | YES                            | NO                      | NO                     | YES                        | YES               | YES (2)                                        | NO                          | YES (2)                                        | YES                      | YES                                  | YES                                | YES                               | 11             |
| Mueller et al. 2021             | YES                            | YES                     | YES                    | YES                        | NO                | YES (2)                                        | YES                         | YES (2)                                        | YES                      | YES                                  | YES                                | YES                               | 13             |

**Table S3. MIT vs CT participant characteristics.**

| Paper                        | Groups                  | Participants | NYH I | NYH II | NYH III | NYH IV | Ischemic CM | Dilated CM | N. of Males | N. of Females | Mean BMI | Mean age | Beta-blockers % | Diuretics % | ACE inhib % | ARB % | ARB and ACE % | Statin | Digoxin % | Warfarin |
|------------------------------|-------------------------|--------------|-------|--------|---------|--------|-------------|------------|-------------|---------------|----------|----------|-----------------|-------------|-------------|-------|---------------|--------|-----------|----------|
| <b>Laoutaris et al. 2013</b> | MIT                     | 14           | 0     | 8      | 6       | 0      | 5           | 9          | 12          | 2             | 25.9     | 58.6     | 71              | 86          | 93          | NR    | NR            | NR     | 64        | NR       |
|                              | Combined MIT + RT + IMT | 13           | 0     | 6      | 7       | 0      | 4           | 9          | 10          | 3             | 26.6     | 57.1     | 69              | 92          | 100         | NR    | NR            | NR     | 69        | NR       |
| <b>Beckers et al. 2008</b>   | MIT                     | 30           | 0     | 12     | 18      | 0      | 18          | 12         | 24          | 6             | 26.2     | 59       | 90              | 70          | NR          | NR    | 100           | 23     | 30        | 40       |
|                              | Combined MIT and RT     | 28           | 0     | 9      | 19      | 0      | 16          | 12         | 18          | 10            | 25.7     | 58       | 57              | 85          | NR          | NR    | 96            | 18     | 39        | 50       |
| <b>Mandic et al. 2009</b>    | MIT                     | 14           | NR    | NR     | NR      | 0      | 7/14        | NR         | 11/14       | 3/14          | 29.8     | 63       | 100             | 71          | 100         | NR    | NR            | NR     | NR        | NR       |
|                              | Combined MIT and RT     | 15           | NR    | NR     | NR      | 0      | 8/15        | NR         | 11/15       | 4/15          | 32.1     | 59       | 100             | 93          | 87          | NR    | NR            | NR     | NR        | NR       |
| <b>Servantes et al. 2012</b> | MIT                     | 18           | 0     | 82.4%  | 17.6%   | 0      | NR          | NR         | 47.1%       | 52.9%         | 26.87    | 51.76    | 100             | 100         | 100         | NR    | NR            | NR     | NR        | NR       |
|                              | Combined MIT and SR     | 18           | 0     | 82.4%  | 17.6%   | 0      | NR          | NR         | 47.1%       | 52.9%         | 27.98    | 50.82    | 100             | 82.4        | 94.1        | NR    | NR            | NR     | NR        | NR       |

**Table S4. MIT vs HIIT participant characteristics.**

| Paper                         | Groups | Participants | NYHA I         | NYHA II         | NYHA III | Ischemic CM | Dilated CM | Males/Females % | Mean BMI | Mean age | Beta-blockers % | Diuretics % | ACE inhib % | ARB % | ARB and ACE % | Statin | Digoxin % | Warfarin |
|-------------------------------|--------|--------------|----------------|-----------------|----------|-------------|------------|-----------------|----------|----------|-----------------|-------------|-------------|-------|---------------|--------|-----------|----------|
| <b>Iellamo et al. 2013</b>    | MIT    | 10           | NR             | "Mainly NYHA 2" | NR       | 0           | 0          | 100%/0%         | 27.2     | 62.6     | 100%            | 63%         | 88%         | 100%  | NR            | 100%   | 12.5%     | NR       |
|                               | HIIT   | 10           | NR             | "Mainly NYHA 2" | NR       | 0           | 0          | 100%/0%         | 27.8     | 62.2     | 100%            | 50%         | 100%        | 100%  | NR            | 100%   | 12.5%     | NR       |
| <b>Ellingsen et al. 2017</b>  | MIT    | 85           | 0              | 63%             | 37%      | 60%         | NR         | 19%/81%         | 27.5     | 60       | 94%             | 75%         | NR          | NR    | 92%           | 72%    | 12%       | NR       |
|                               | HIIT   | 90           | 0              | 71%             | 29%      | 60%         | NR         | 18%/82%         | 27.6     | 65       | 95%             | 75%         | NR          | NR    | 92%           | 65%    | 22%       | NR       |
| <b>Iellamo et al. 2014</b>    | MIT    | 18           | 33.3%          | 66.7%           | 0        | NR          | NR         | 83.3%/16.7%     | 28.1     | 68.4     | 77.8%           | 61%         | NR          | NR    | 94%           | 83%    | NR        | 17%      |
|                               | HIIT   | 18           | 44.4%          | 55.6%           | 0        | NR          | NR         | 88.9%/11.1%     | 28.3     | 67.2     | 88.9%           | 72%         | NR          | NR    | 88.9%         | 72%    | NR        | 17%      |
| <b>Besnier et al. 2019</b>    | MIT    | 15           | 40%            | 46.7%           | 13.3%    | 11          | 4          | 73.3%/26.7%     | 28       | 59.5     | 87%             | 73%         | 67%         | 13%   | NR            | NR     | NR        | NR       |
|                               | HIIT   | 16           | 50%            | 43.75%          | 6.25%    | 9           | 7          | 68.8%/31.2%     | 25       | 59       | 94%             | 75%         | 50%         | 0%    | NR            | NR     | NR        | NR       |
| <b>Koufaki et al. 2014</b>    | MIT    | 17           | Median 2 (1-3) |                 |          | NR          | NR         | 76.5%/23.5%     | 29.2     | 59.7     | 59%             | 65%         | 76%         | NR    | NR            | 53%    | NR        | NR       |
|                               | HIIT   | 16           | Median 2 (1-3) |                 |          | NR          | NR         | 87.5%/12.5%     | 29.2     | 59.8     | 69%             | 56%         | 63%         | NR    | NR            | 88%    | NR        | NR       |
| <b>Wisløff et al. 2007</b>    | MIT    | 9            | NR             | NR              | NR       | NR          | NR         | 77.8%/22.2%     | 24.7     | 74.4     | 100%            | 44%         | 100%        | NR    | NR            | 100%   | NR        | 67%      |
|                               | HIIT   | 9            | NR             | NR              | NR       | NR          | NR         | 77.8%/22.2%     | 24.5     | 76.5     | 100%            | 56%         | 100%        | NR    | NR            | 100%   | NR        | 56%      |
| <b>Dimopoulos et al. 2006</b> | MIT    | 14           | 28.57%         | 64.29%          | 7.1%     | 5           | 8          | 100%/0%         | 27.2     | 61.5     | 86%             | 79%         | 21%         | NR    | NR            | NR     | NR        | NR       |
|                               | HIIT   | 10           | 30%            | 60%             | 10%      | 4           | 6          | 90%/10%         | 26.5     | 59.2     | 80%             | 100%        | 100%        | NR    | NR            | NR     | NR        | NR       |
| <b>Freyssin et al. 2012</b>   | MIT    | 14           | NR             | NR              | NR       | 12          | 14         | 50%/50%         | 24.1     | 55       | 100%            | 100%        | 86%         | NR    | NR            | 64%    | NR        | NR       |
|                               | HIIT   | 12           | NR             | NR              | NR       | 10          | 12         | 50%/50%         | 24.8     | 54       | 100%            | 100%        | 83%         | NR    | NR            | 75%    | NR        | NR       |
| <b>Fu et al. 2013</b>         | MIT    | 15           | NR             | NR              | NR       | 60%         | NR         | 60%/40%         | NR       | 66.3     | 93%             | 47%         | NR          | NR    | 80%           | NR     | 27%       | NR       |
|                               | HIIT   | 15           | NR             | NR              | NR       | 67%         | NR         | 66.7%/33.3%     | NR       | 67.5     | 93%             | 53%         | NR          | NR    | 80%           | NR     | 20%       | NR       |
| <b>Ulbrich et al. 2016</b>    | MIT    | 10           | 0              | 100%            | 0        | 36.40%      | NR         | 100%/0%         | 27.47    | 54.02    | 45.50%          | 50%         | 50%         | NR    | NR            | 18.20% | NR        | NR       |
|                               | HIIT   | 12           | 0              | 91.7%           | 8.3%     | 31.80%      | NR         | 100%/0%         | 29.73    | 53.15    | 45.50%          | 40.90%      | 36.40%      | NR    | NR            | 31.80% | NR        | NR       |

|                                        |      |    |   |     |     |    |    |         |      |      |      |      |     |     |      |     |    |    |
|----------------------------------------|------|----|---|-----|-----|----|----|---------|------|------|------|------|-----|-----|------|-----|----|----|
| <b>Donelli da Silveira et al. 2020</b> | MIT  | 9  | 0 | 89% | 11% | NR | NR | 44%/56% | 34   | 60   | 78%  | 89%  | NR  | NR  | 100% | 78% | NR | NR |
|                                        | HIIT | 10 | 0 | 80% | 20% | NR | NR | 30%/70% | 33   | 60   | 100% | 100% | NR  | NR  | 100% | 80% | NR | NR |
| <b>Angadi et al. 2015</b>              | MIT  | 6  | 0 | NR  | NR  | NR | NR | 67%/33% | 29.4 | 71.5 | 56%  | 67%  | 17% | 33% | NR   | 67% | NR | NR |
|                                        | HIIT | 9  | 0 | NR  | NR  | NR | NR | 89%/11% | 29.5 | 69   | 67%  | 44%  | 56% | 0%  | NR   | 67% | NR | NR |
| <b>Mueller et al. 2021</b>             | MIT  | 58 | 0 | 76% | 24% | NR | NR | 40%/60% | 31.1 | 70   | 59%  | 52%  | 31% | 45% | NR   | NR  | NR | NR |
|                                        | HIIT | 58 | 0 | 76% | 24% | NR | NR | 29%/71% | 30   | 70   | 69%  | 62%  | 33% | 43% | NR   | NR  | NR | NR |

Figure S1: MIT vs CT publication bias funnel plot of standard error by difference in means.

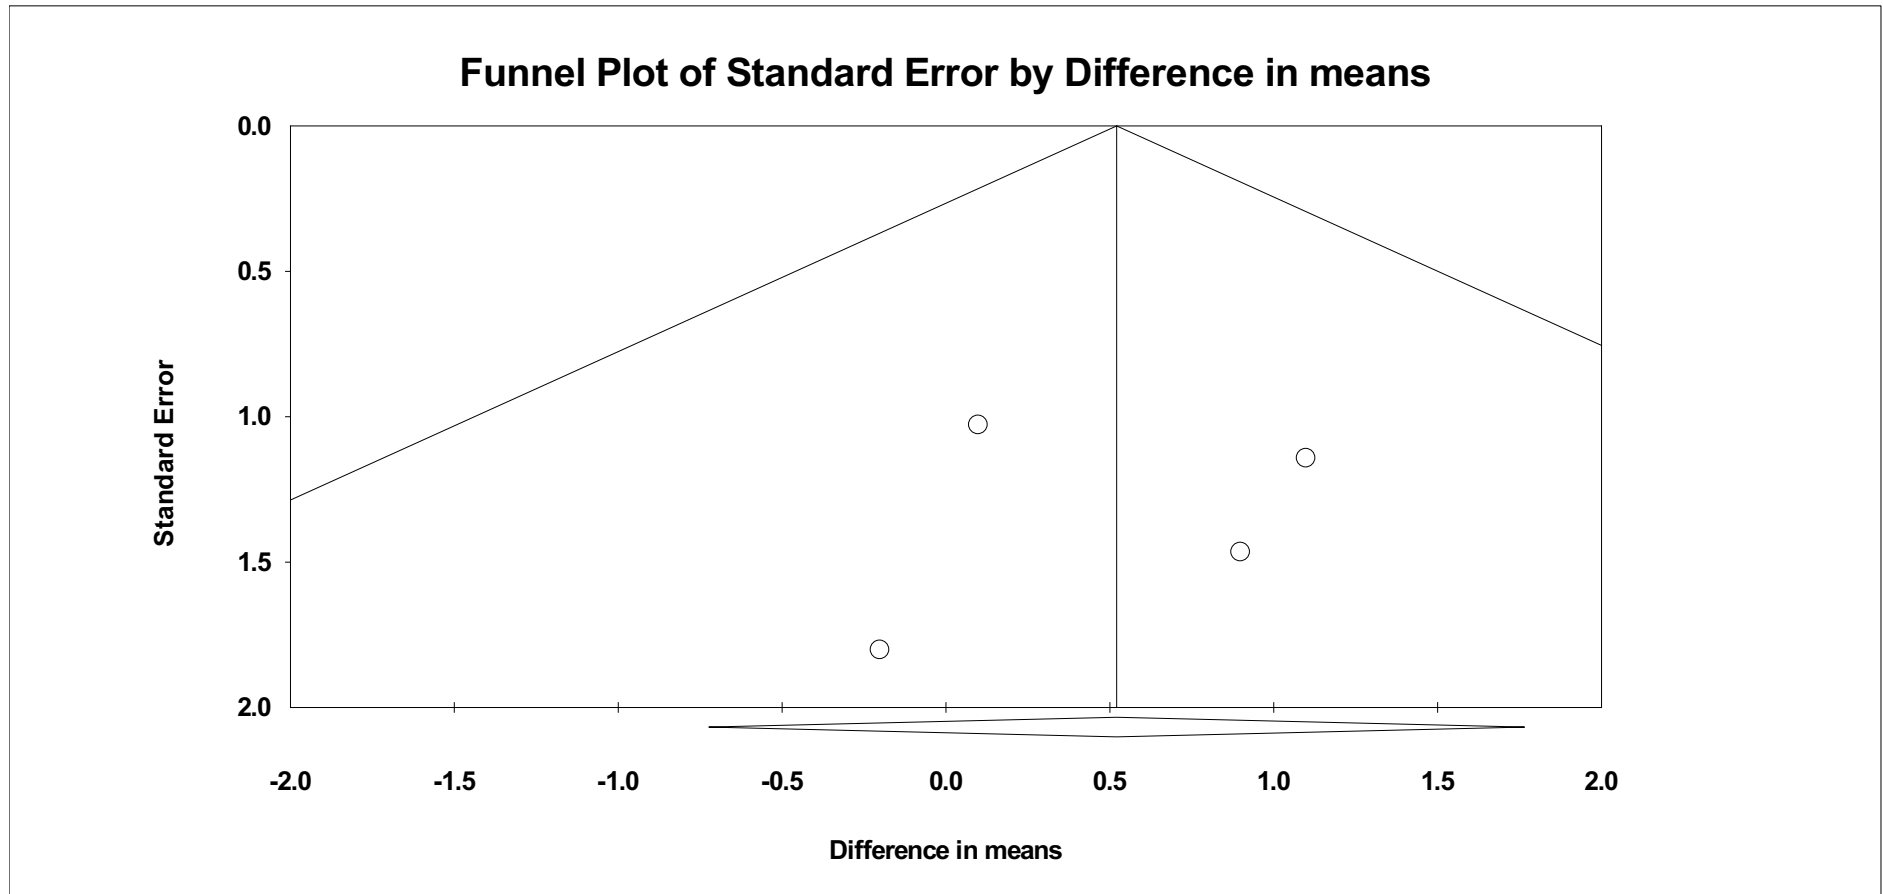



Figure S2: MIT vs HIIT publication bias funnel plot of standard error by difference in me

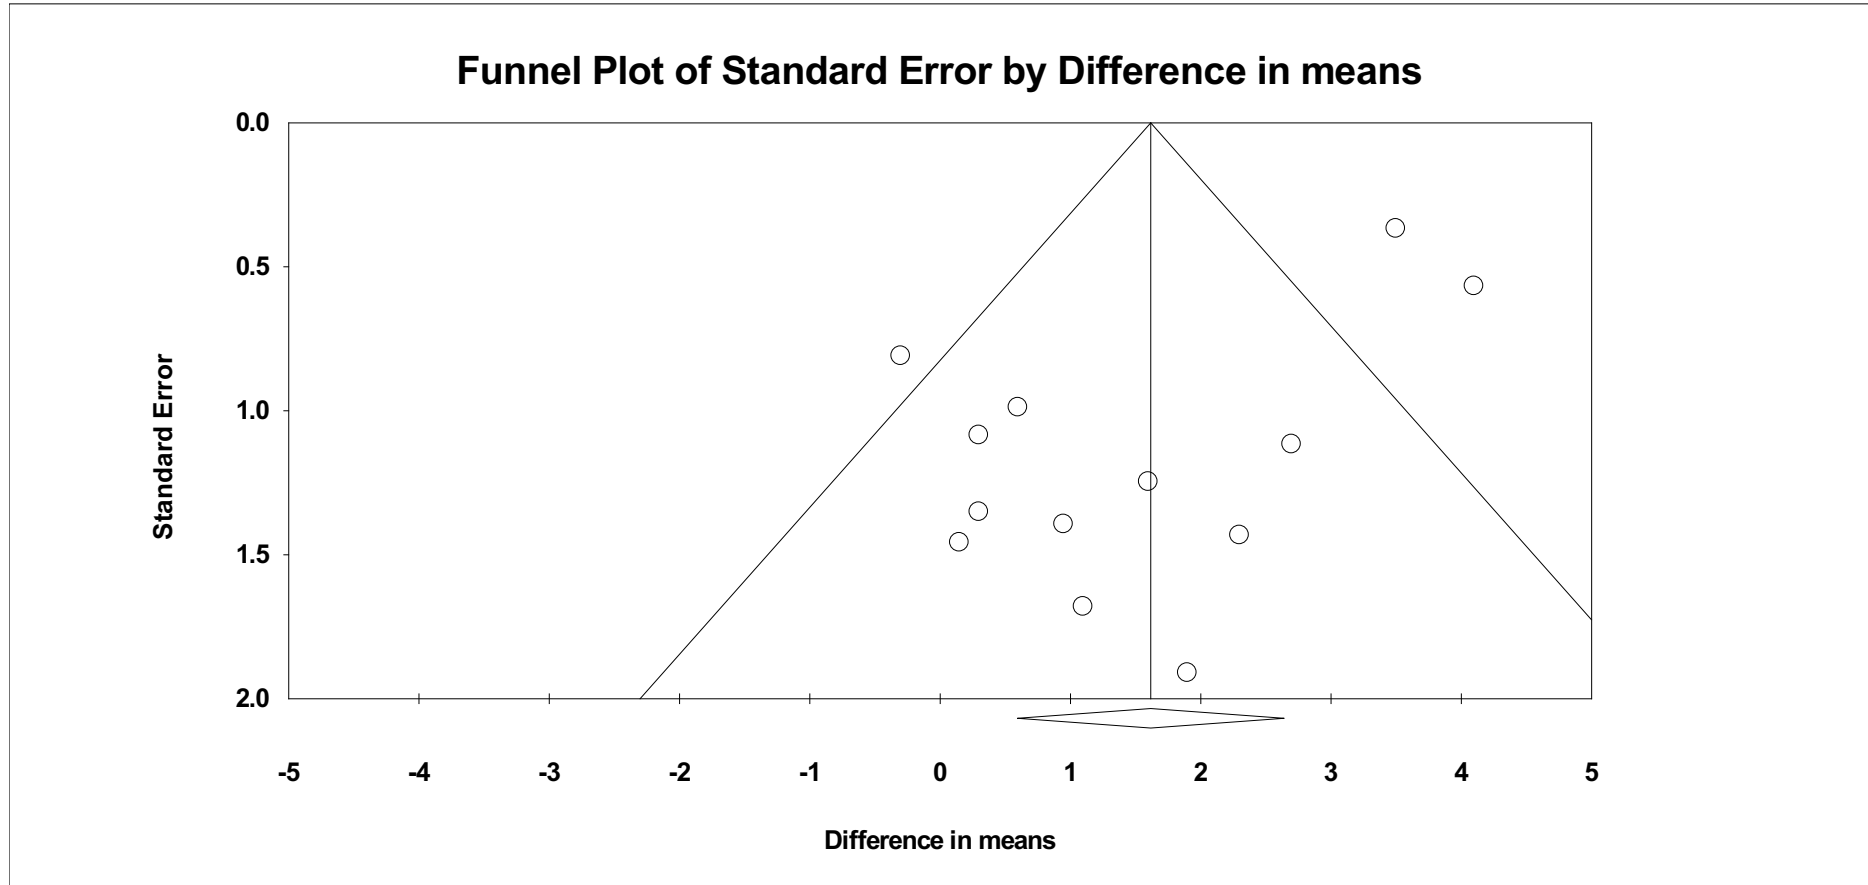

## **Analysed Studies**

### **MIT vs CT:**

1. Beckers, P.J., Denollet, J., Possemiers, N.M., Wuyts, F.L., Vrints, C.J. and Conraads, V.M., 2008. Combined endurance-resistance training vs. endurance training in patients with chronic heart failure: a prospective randomized study. *European heart journal*, 29(15), pp.1858-1866.
2. Laoutaris, I.D., Adamopoulos, S., Manginas, A., Panagiotakos, D.B., Kallistratos, M.S., Doulaptsis, C., Kouloubinis, A., Voudris, V., Pavlides, G., Cokkinos, D.V. and Dritsas, A., 2013. Benefits of combined aerobic/resistance/inspiratory training in patients with chronic heart failure. A complete exercise model? A prospective randomised study. *International journal of cardiology*, 167(5), pp.1967-1972.
3. Mandic, S., Tymchak, W., Kim, D., Daub, B., Quinney, H.A., Taylor, D., Al-Kurtass, S. and Haykowsky, M.J., 2009. Effects of aerobic or aerobic and resistance training on cardiorespiratory and skeletal muscle function in heart failure: a randomized controlled pilot trial. *Clinical rehabilitation*, 23(3), pp.207-216.
4. Servantes, D.M., Pelcerman, A., Salvetti, X.M., Salles, A.F., de Albuquerque, P.F., de Salles, F.C.A., Lopes, C., de Mello, M.T., Almeida, D.R. and Filho, J.A.O., 2012. Effects of home-based exercise training for patients with chronic heart failure and sleep apnoea: a randomized comparison of two different programmes. *Clinical rehabilitation*, 26(1), pp.45-57.

## MIT vs HIIT:

1. Angadi, S.S., Mookadam, F., Lee, C.D., Tucker, W.J., Haykowsky, M.J. and Gaesser, G.A., 2015. High-intensity interval training vs. moderate-intensity continuous exercise training in heart failure with preserved ejection fraction: a pilot study. *Journal of Applied Physiology*, 119(6), pp.753-758.
2. Besnier, F., Labrunée, M., Richard, L., Faggianelli, F., Kerros, H., Soukarié, L., Bousquet, M., Garcia, J.L., Pathak, A., Gales, C. and Guiraud, T., 2019. Short-term effects of a 3-week interval training program on heart rate variability in chronic heart failure. A randomised controlled trial. *Annals of physical and rehabilitation medicine*, 62(5), pp.321-328.
3. Dimopoulos, S., Anastasiou-Nana, M., Sakellariou, D., Drakos, S., Kapsimalakou, S., Maroulidis, G., Roditis, P., Papazachou, O., Vogiatzis, I., Roussos, C. and Nanas, S., 2006. Effects of exercise rehabilitation program on heart rate recovery in patients with chronic heart failure. *European Journal of Preventive Cardiology*, 13(1), pp.67-73.
4. Donelli da Silveira, A., Beust de Lima, J., da Silva Piardi, D., dos Santos Macedo, D., Zanini, M., Nery, R., Laukkanen, J.A. and Stein, R., 2020. High-intensity interval training is effective and superior to moderate continuous training in patients with heart failure with preserved ejection fraction: A randomized clinical trial. *European journal of preventive cardiology*, 27(16), pp.1733-1743.
5. Ellingsen, Ø., Halle, M., Conrads, V., Støylen, A., Dalen, H., Delagardelle, C., Larsen, A.I., Hole, T., Mezzani, A., Van Craenenbroeck, E.M. and Videm, V., 2017. High-intensity interval training in patients with heart failure with reduced ejection fraction. *Circulation*, 135(9), pp.839-849.
6. Freyssin, C., Verkindt, C., Prieur, F., Benaich, P., Maunier, S. and Blanc, P., 2012. Cardiac rehabilitation in chronic heart failure: effect of an 8-week, high-intensity interval training versus continuous training. *Archives of physical medicine and rehabilitation*, 93(8), pp.1359-1364.
7. Fu, T.C., Wang, C.H., Lin, P.S., Hsu, C.C., Cherng, W.J., Huang, S.C., Liu, M.H., Chiang, C.L. and Wang, J.S., 2013. Aerobic interval training improves oxygen uptake efficiency by enhancing cerebral and muscular hemodynamics in patients with heart failure. *International journal of cardiology*, 167(1), pp.41-50.
8. Iellamo, F., Caminiti, G., Sposato, B., Vitale, C., Massaro, M., Rosano, G. and Volterrani, M., 2014. Effect of High-Intensity interval training versus moderate

- continuous training on 24-h blood pressure profile and insulin resistance in patients with chronic heart failure. *Internal and emergency medicine*, 9(5), pp.547-552.
9. Iellamo, F., Manzi, V., Caminiti, G., Vitale, C., Castagna, C., Massaro, M., Franchini, A., Rosano, G. and Volterrani, M., 2013. Matched dose interval and continuous exercise training induce similar cardiorespiratory and metabolic adaptations in patients with heart failure. *International journal of cardiology*, 167(6), pp.2561-2565.
  10. Koufaki, P., Mercer, T.H., George, K.P. and Nolan, J., 2014. Low-volume high-intensity interval training vs continuous aerobic cycling in patients with chronic heart failure: a pragmatic randomised clinical trial of feasibility and effectiveness. *Journal of rehabilitation medicine*, 46(4), pp.348-356.
  11. Mueller, S., Winzer, E.B., Duvinage, A., Gevaert, A.B., Edelmann, F., Haller, B., Pieske-Kraigher, E., Beckers, P., Bobenko, A., Hommel, J. and Van de Heyning, C.M., 2021. Effect of high-intensity interval training, moderate continuous training, or guideline-based physical activity advice on peak oxygen consumption in patients with heart failure with preserved ejection fraction: a randomized clinical trial. *Jama*, 325(6), pp.542-551.
  12. Ulbrich, A.Z., Angarten, V.G., Netto, A.S., Sties, S.W., Bündchen, D.C., De Mara, L.S., Cornelissen, V.A. and De Carvalho, T., 2016. Comparative effects of high intensity interval training versus moderate intensity continuous training on quality of life in patients with heart failure: study protocol for a randomized controlled trial. *Clinical Trials and Regulatory Science in Cardiology*, 13, pp.21-28.
  13. Wisløff, U., Støylen, A., Loennechen, J.P., Bruvold, M., Rognum, Ø., Haram, P.M., Tjønnå, A.E., Helgerud, J., Slørdahl, S.A., Lee, S.J. and Videm, V., 2007. Superior cardiovascular effect of aerobic interval training versus moderate continuous training in heart failure patients: a randomized study. *Circulation*, 115(24), pp.3086-3094.
